# Supplementary material for: Whole-genome sequencing of two probands with hereditary spastic paraplegia reveals novel splice-donor region variant and known pathogenic variant in SPG11
Source: PubMed Central journal article supplement (PMC5111012; doi:10.1101/mcs.a001248), 2016-11
Supplement: supp_mcs.a001248_SuppTable1.pdf [file supp_mcs.a001248_SuppTable1.pdf]

| <b>Sample</b>                    | <b>I:1</b> | <b>I:2</b> | <b>II:1</b> | <b>II:2</b> |
|----------------------------------|------------|------------|-------------|-------------|
| <b>#Total Reads (Million)</b>    | 1387.95    | 1561.69    | 1368.81     | 1397.71     |
| <b>Aligned Reads (Million)</b>   | 1279.25    | 1447.27    | 1256.06     | 1295.88     |
| <b>% Aligned Reads</b>           | 92.17      | 92.67      | 91.76       | 92.71       |
| <b>Aligned Bases (GB)</b>        | 190.3      | 214.72     | 186.41      | 192.72      |
| <b>Depth of Coverage</b>         | 61.47      | 69.36      | 60.22       | 62.25       |
| <b>Duplicate reads (Million)</b> | 95.129136  | 101.06036  | 79.703854   | 91.452988   |
| <b>% Duplicates</b>              | 6.59%      | 6.23%      | 5.60%       | 6.30%       |
| <b>SNPs</b>                      | 3925696    | 3955323    | 3910033     | 3943404     |
| <b>INDELs</b>                    | 849617     | 860070     | 862920      | 860168      |
| <b>Ti/Tv</b>                     | 1.97       | 1.98       | 1.98        | 1.98        |
| <b>SNPs (MAF&lt;0.5)</b>         | 327328     | 325737     | 320062      | 320165      |
| <b>INDELs (MAF&lt;0.5)</b>       | 126589     | 129808     | 132240      | 129362      |

Supplementary Table 1. Whole-genome sequencing and variant calling statistics
